# Supplementary material
Source: Frontiers journal article supplement (https://www.frontiersin.org/articles/303620)
Supplement: Image_1.PDF [file Image_1.PDF]

## Image Analysis Pipeline

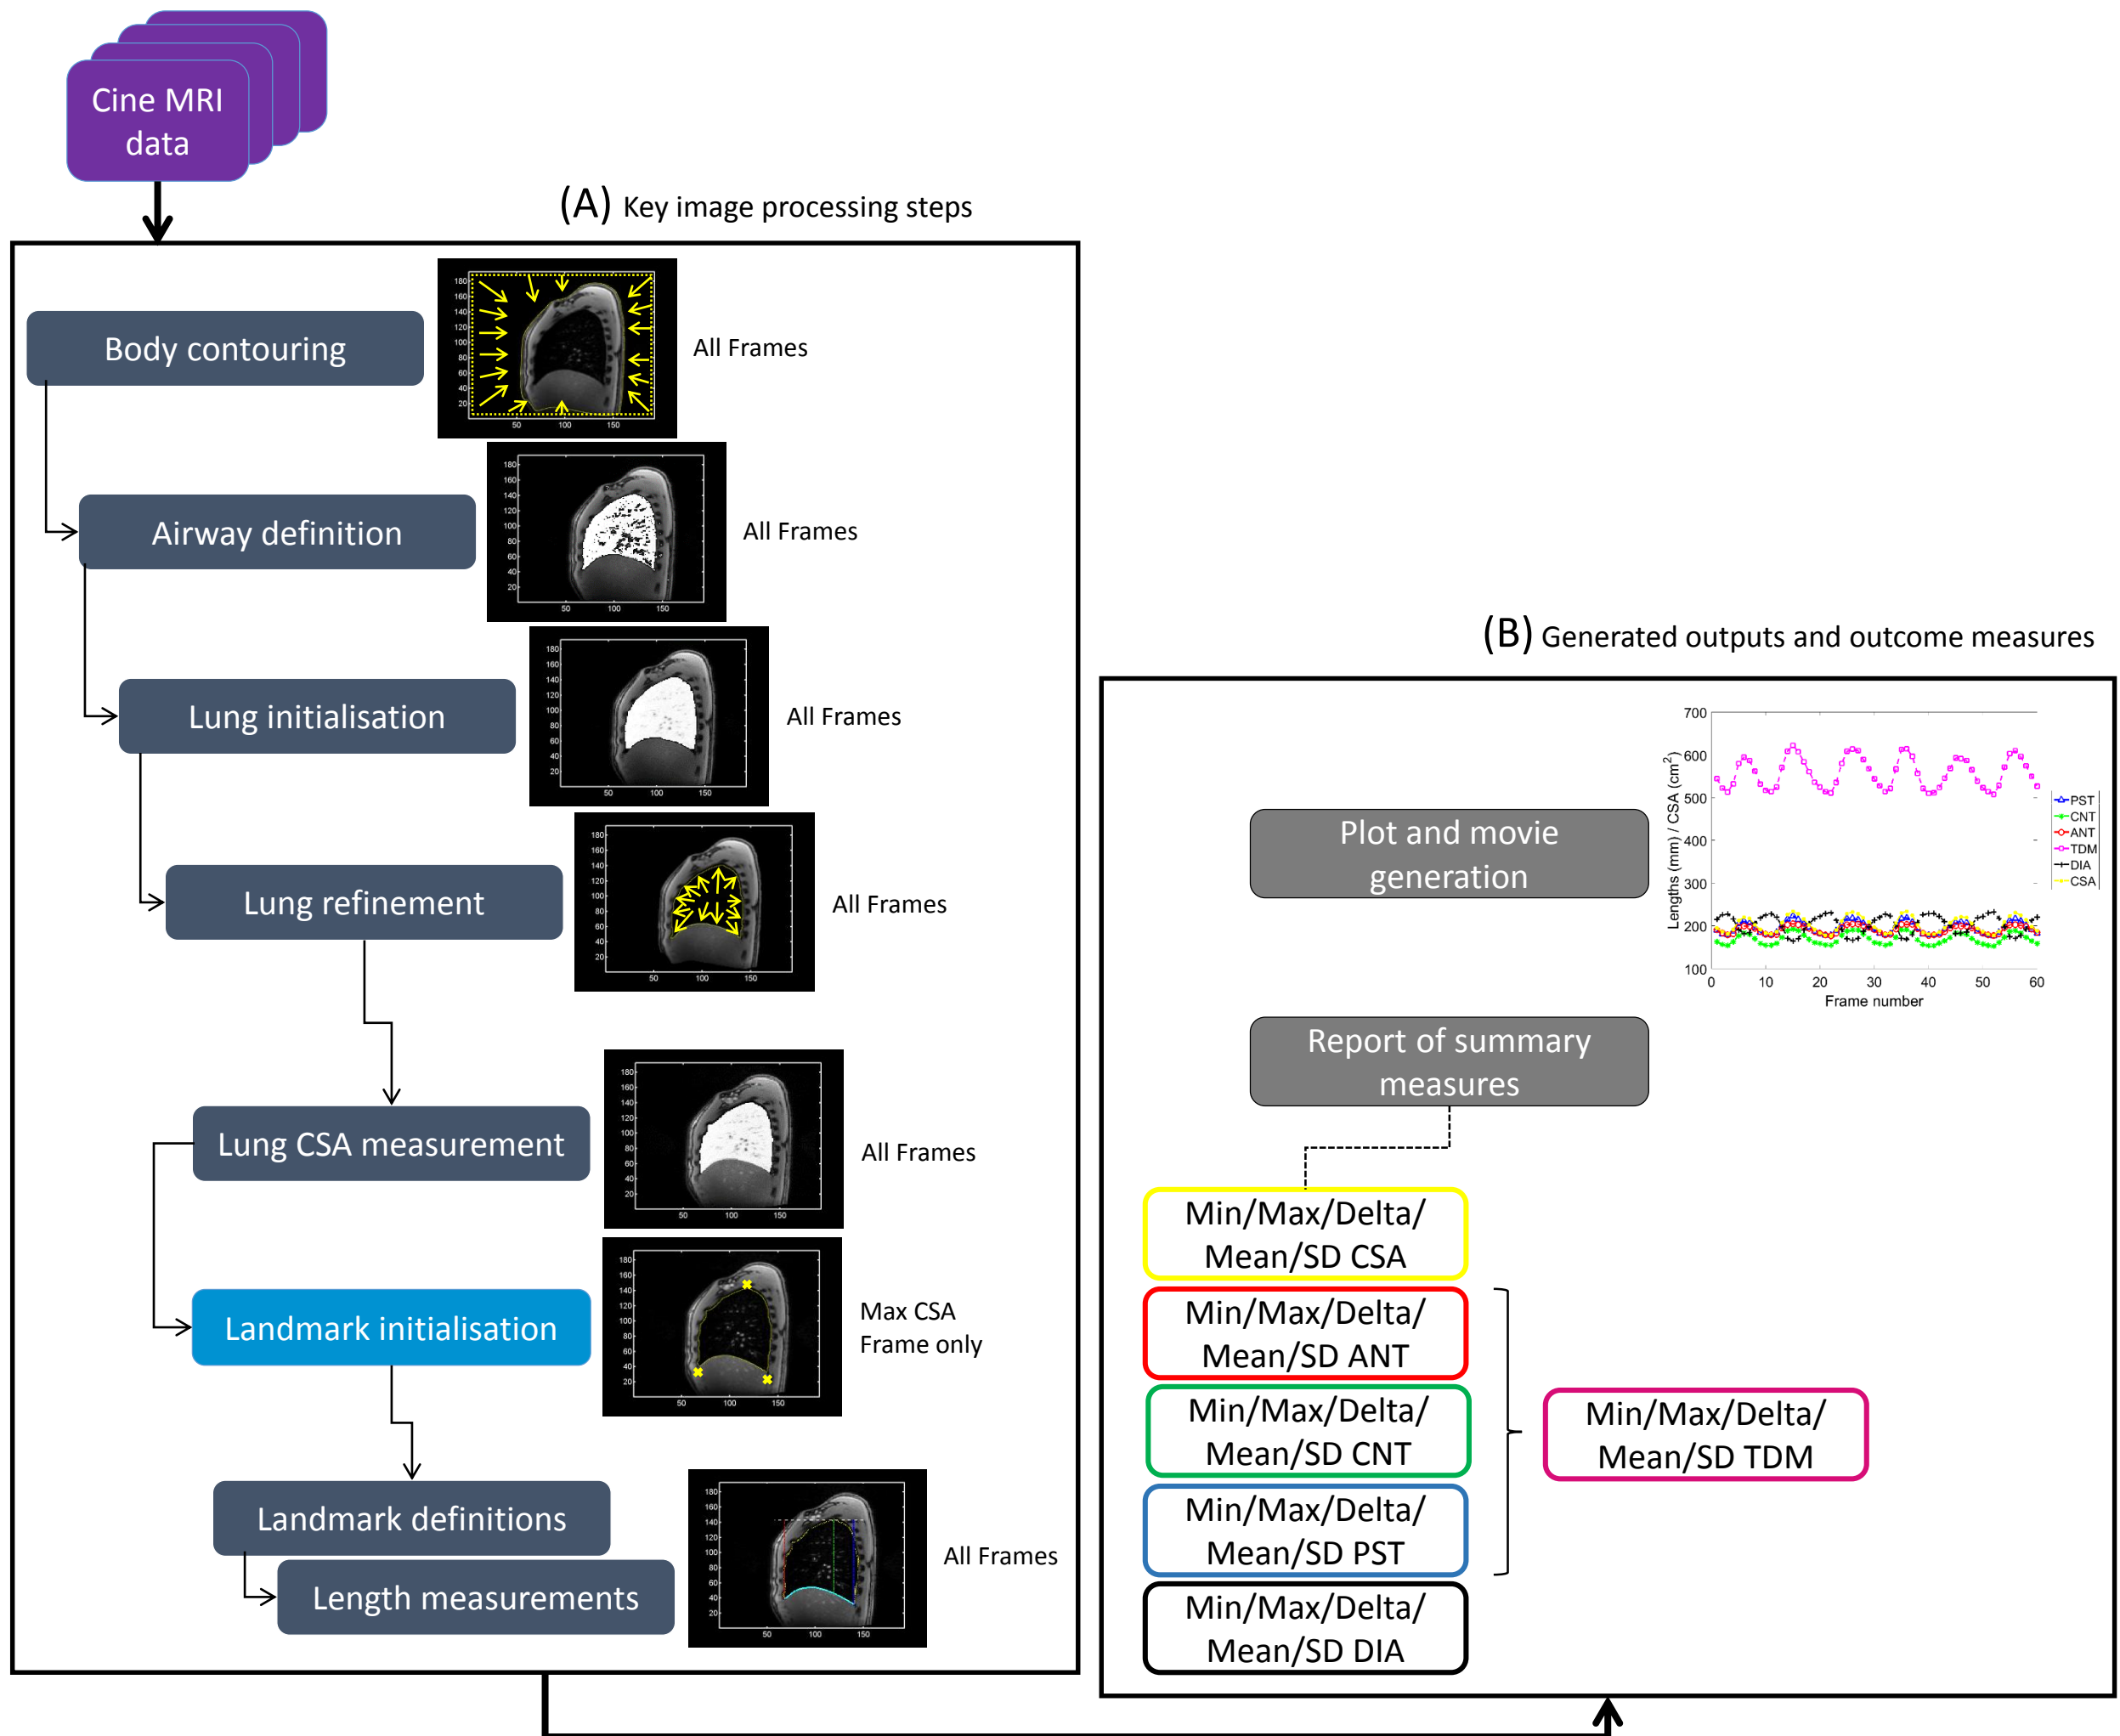

**Supplementary Figure 1.** A schematic of the image analysis pipeline developed in MATLAB, including the key image processing steps (A) and the generated outputs (B) which contain a plot of the temporal profiles of the lung cross-sectional area (CSA), the lung 1-D length measures (ANT, CNT and PST) and their sum (TDM), as well as the full diaphragm length (DIA).
